# Supplementary material for: Arising synergetic and antagonistic effects in the design of Ni- and Ru-based water splitting electrocatalysts
Source: Royal Society of Chemistry journal article supplement (doi:10.1039/c8ta08535h), 2018-12-03
Supplement: c8ta08535h1.pdf [file c8ta08535h1.pdf]

## Electronic Supplementary Information

### **Arising Synergetic and Antagonistic Effects in the Design of Ni- and Ru-Based Water Splitting Electrocatalysts**

Filipe Marques Mota,<sup>a</sup> Chi Hun Choi,<sup>a</sup> Ramireddy Boppella,<sup>a</sup> Ji-Eun Lee<sup>a</sup> and Dong Ha Kim<sup>a,b,\*</sup>

<sup>a</sup>. Department of Chemistry and Nano Science, Division of Molecular and Life Sciences, College of Natural Sciences, Ewha Womans University, 52, Ewhayeodae-gil, Seodaemun-gu, Seoul 03760, Republic of Korea

<sup>b</sup>. Division of Chemical Engineering and Materials Science, College of Engineering, Ewha Womans University, 52, Ewhayeodae-gil, Seodaemun-gu, Seoul 03760, Republic of Korea

\* Correspondence: dhkim@ewha.ac.kr; Fax: +82-2-3277-4546; Tel.: +82-2-3277-4517

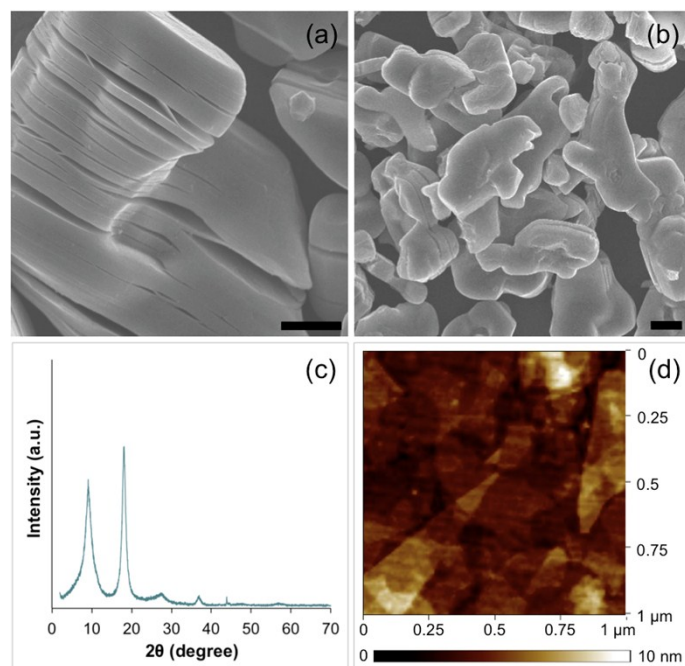

**Fig. S1** SEM images of (a) the pristine sodium ruthenate following heating at 900°C (scale = 1 μm) and (b) the hydrated layered protonic ruthenate following proton exchange with HCl 1M (scale = 1 μm). (c) XRD patterns of the final TMA-intercalated exfoliated material. (d) AFM analysis of the resulting ruthenate nanosheets evidencing the atomically thin structure of these materials.

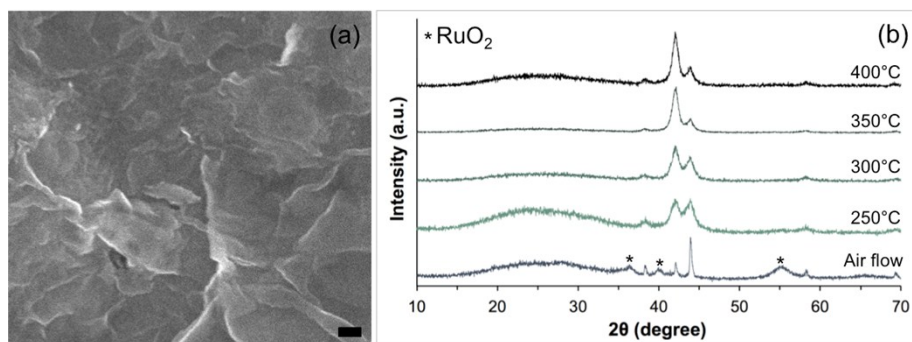

**Fig. S2** (a) SEM images (scale = 100 nm) of pristine Ru-based electrode following heat treatment at 250°C under argon. (b) XRD patterns for pristine Ru-based references heat treated under argon flow at an increasing 250°C to 400°C temperature range, and alternatively following treatment under air flow at 250°C.

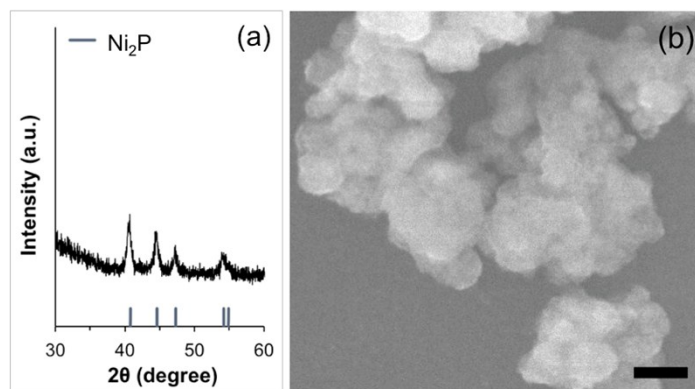

**Fig. S3** (a) XRD patterns of individually synthesized  $\text{Ni}_2\text{P}$  at  $250^\circ\text{C}$  under Ar flow and (b) corresponding SEM images (scale = 100 nm).

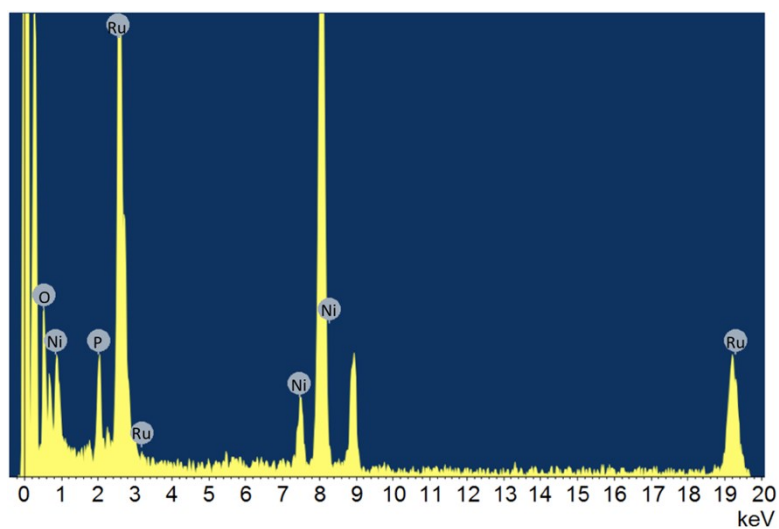

**Fig. S4** EDX results evidencing the presence of Ru, Ni, and P in the prepared hybrid electrode.

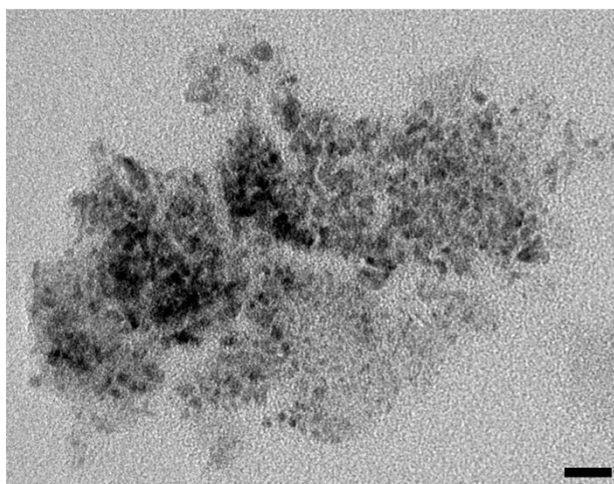

**Fig. S5** TEM images of the resulting hybrid electrode with an increasing Ni/Ru ratio (scale = 10 nm).

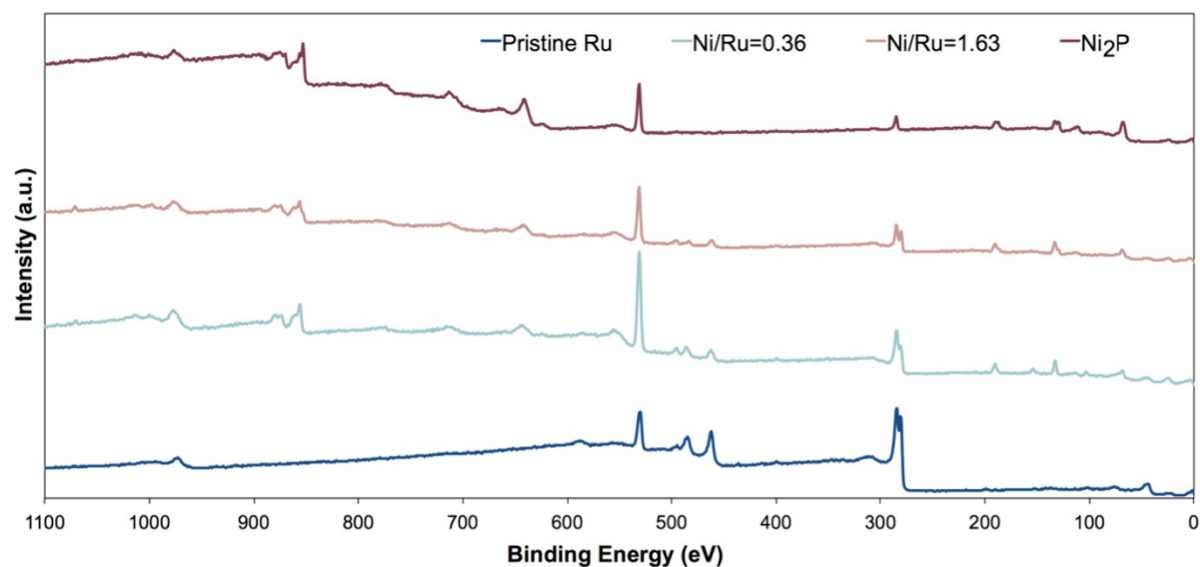

**Fig. S6** XPS Survey Scans of the pristine Ru reference, the prepared hybrid electrodes (Ni/Ru ratios of 0.36 and 1.63), and an individually prepared Ni<sub>2</sub>P.

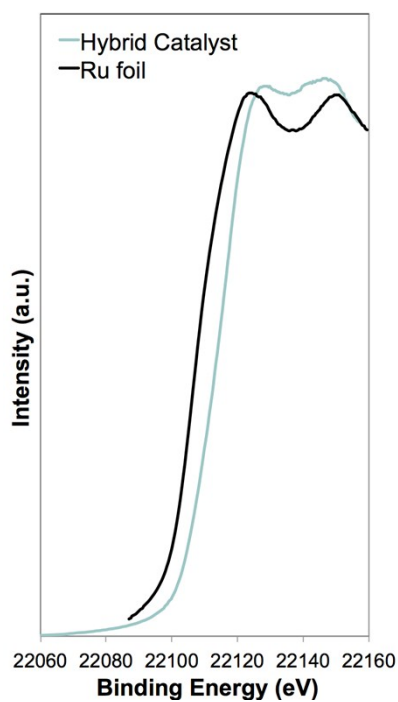

**Fig. S7** Ru K-edge XANES spectra for the hybrid electrode (Ni/Ru ratio of 0.36) and comparison with a Ru foil reference.

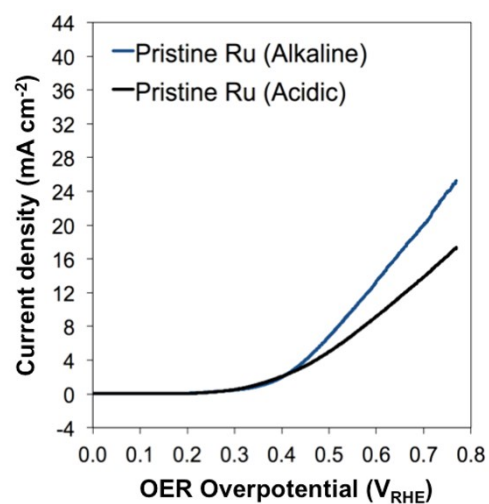

**Fig. S8** Required overpotentials during OER assessment of the pristine Ru reference in either alkaline 0.1 M KOH or acidic 0.5 M H<sub>2</sub>SO<sub>4</sub> electrolytes at 25 °C, at a scan rate of 5 mV/s.
